# Supplementary material
Source: PubMed Central journal article supplement (PMC8617589)
Supplement: Supp_Fig1.pdf [file Supp_Fig1.pdf]

## Supplementary Data

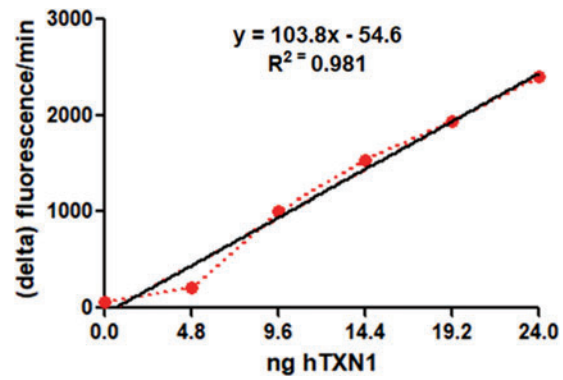

**SUPPLEMENTARY FIG. S1. Calibration curve for TXN activity assay.** Curve was generated using defined standards of human recombinant TXN1 corresponding to 0, 4.8, 9.6, 14.4, 19.2, and 24 ng. TXN, thioredoxin.
