# Supplementary material
Source: PubMed Central journal article supplement (PMC8617589)
Supplement: Supp_Fig2.pdf [file Supp_Fig2.pdf]

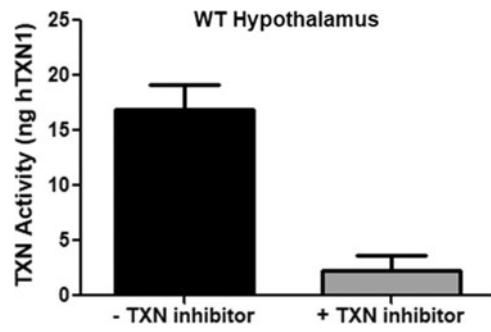

**SUPPLEMENTARY FIG. S2. Verification of the specificity of the TXN activity assay by means of a negative control.** TXN activity of WT hypothalamic samples is obstructed by addition of the potent TXN inhibitor, PX12 ( $5 \mu M$ ). WT, wild type.
