# Supplementary material
Source: PubMed Central journal article supplement (PMC8617589)
Supplement: Supp_Fig3.pdf [file Supp_Fig3.pdf]

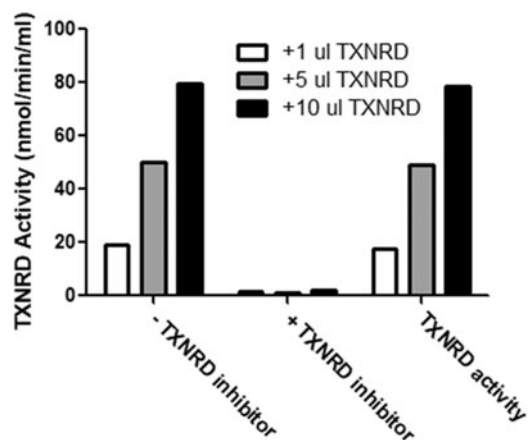

**SUPPLEMENTARY FIG. S3. Controls for TXNRD activity assay.** TXNRD activity was determined based upon the reduction of DNTB to TNB. For each sample, DNTB reduction was measured in the absence and presence of sodium aurothiomalate, a specific inhibitor of TXNRD. This allows for the correction of TXNRD-independent reduction of DNTB. Displayed above are data obtained from a positive control of purified rat liver TXNRD. Activity data is shown for the positive control without (*left*) and with (*middle*) the TXNRD inhibitor added. Data shown on the *far right* is for TXNRD activity following the correction for TXNRD-independent activity. TXNRD, thioredoxin reductase.
