# Supplementary material
Source: PubMed Central journal article supplement (PMC8617589)
Supplement: Supp_Fig4.pdf [file Supp_Fig4.pdf]

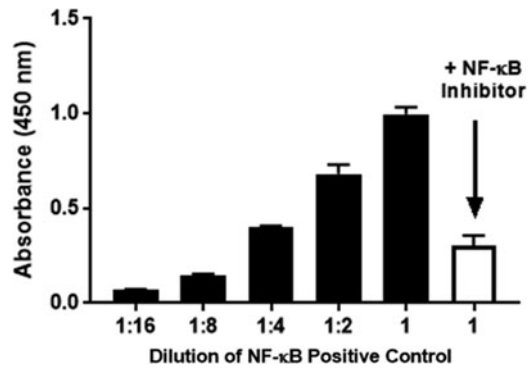

**SUPPLEMENTARY FIG. S4. Controls for NF- $\kappa$ B activity assay.** To verify assay specificity and monitor the dynamic range, serial dilutions of a positive control for NF- $\kappa$ B activation were run in parallel to generate a standard curve. One unit of NF- $\kappa$ B activity was defined as being equivalent to the response of the undiluted positive control. Also included to verify specificity was a negative control where NF- $\kappa$ B competitor dsDNA was co-administered in conjunction with the undiluted positive control. NF- $\kappa$ B, nuclear factor kappa-light-enhancer of activated B-cells.
